# Supplementary material for: Striking Differences between Knockout and Wild-Type Mice in Global Gene Expression Variability
Source: PubMed Central journal article supplement (PMC4022672; doi:10.1371/journal.pone.0097734), 2014-05-15
Supplement: pone.0097734.s001.pdf [file pone.0097734.s001.pdf]

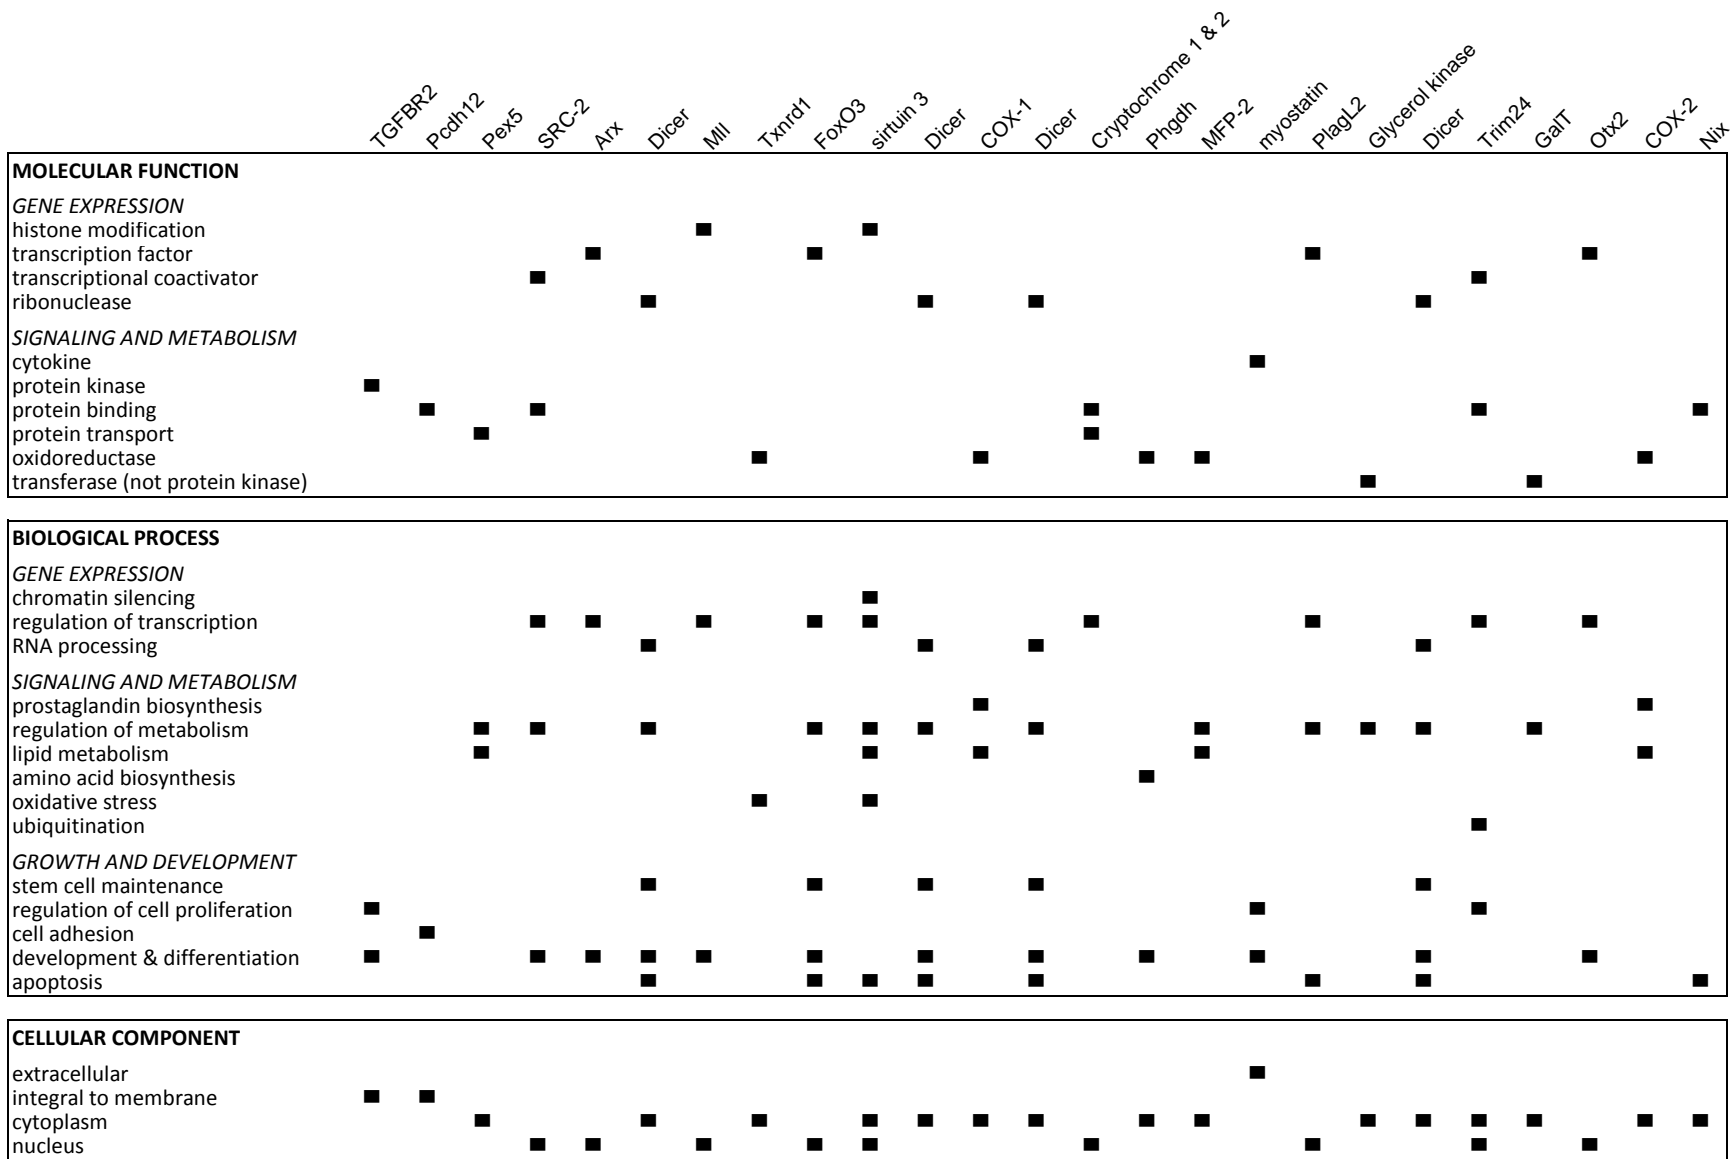

**Figure S1. Gene Ontology (GO) annotations of the genes knocked out in the analyzed studies.** Annotations were obtained from the Stanford Source (<http://source.stanford.edu>) and GeneCards (<http://www.genecards.org/>), and manually curated. Genes are listed in the same order as the corresponding knockouts in Figure 2 (i.e., in the order of increasing associated variability difference).
