# Supplementary material for: Striking Differences between Knockout and Wild-Type Mice in Global Gene Expression Variability
Source: PubMed Central journal article supplement (PMC4022672; doi:10.1371/journal.pone.0097734), 2014-05-15
Supplement: pone.0097734.s003.pdf [file pone.0097734.s003.pdf]

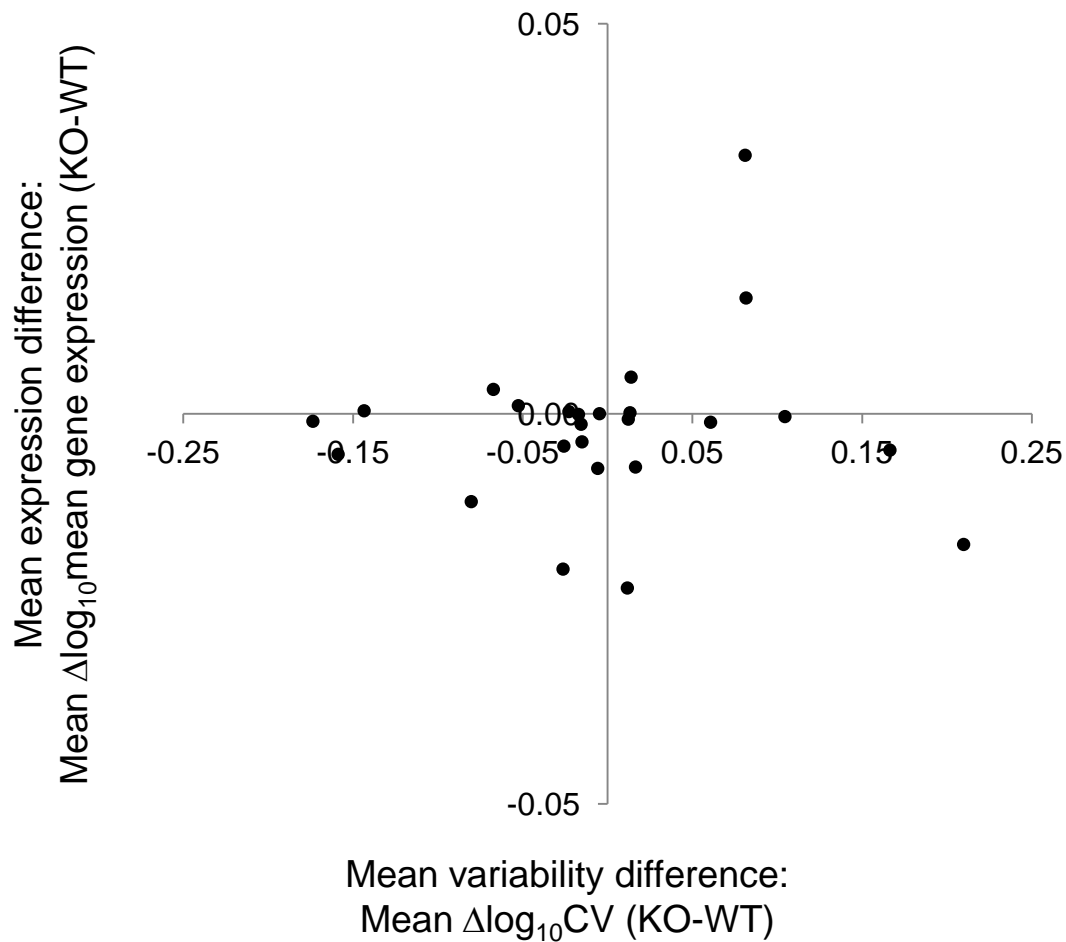

**Figure S3. Relationship across the twenty-five analyzed datasets between the mean expression difference between knockouts and wild-types and mean variability difference.** The mean expression difference for each dataset was calculated as the mean across probe sets of the difference between  $\log_{10}$  mean expression in knockout and  $\log_{10}$  mean expression in wild-type (termed here  $\Delta\log_{10}$  mean gene expression (KO-WT)), filtering out probe sets falling below a specified expression threshold. Mean variability differences (termed here  $\Delta\log_{10}$  CV (KO-WT)) were taken from the data in Figure 2 and were calculated in an analogous manner. No significant relationship was noted between the expression and variability differences (Pearson's correlation coefficient = 0.063,  $p = 0.766$ ; Spearman's correlation coefficient = 0.033,  $p = 0.87$ ). KO, knockout; WT, wild-type; CV, coefficient of variation. Note the different scales of the two axes. Please refer to the text for details.
